# Supplementary material for: Copper-incorporated bioactive glass-ceramics inducing anti-inflammatory phenotype and regeneration of cartilage/bone interface
Source: PubMed Central journal article supplement (PMC6735521; doi:10.7150/thno.36120), 2019-08-14
Supplement: thnov09p6300s1.pdf [file thnov09p6300s1.pdf]

**Supporting information**

**for “Copper-incorporated bioactive glass-ceramics inducing  
anti-inflammatory phenotype and regeneration of cartilage/bone  
interface”**

Rongcai Lin<sup>1#</sup>, Cuijun Deng<sup>2, 3#</sup>, Xuxiang Li<sup>1</sup>, Yaqin Liu<sup>2</sup>, Meng Zhang<sup>2</sup>, Chen Qin<sup>2</sup>, Qingqiang

Yao<sup>1,\*</sup>, Liming Wang<sup>1,\*</sup>, Chengtie Wu<sup>2\*</sup>

1. Department of Orthopaedics, Nanjing First Hospital, Nanjing Medical University. Nanjing  
210006, P.R.China

2. State Key Laboratory of High Performance Ceramics and Superfine Microstructure, Shanghai  
Institute of Ceramics, Chinese Academy of Sciences. Shanghai 200050, P.R.China

3. Shanghai East Hospital, the Institute for Biomedical Engineering & Nano Science, Tongji  
University School of Medicine, 150 Jimo Road, Shanghai 200092, P.R.China

**\* Corresponding Author**

Email: [limingwang99@yahoo.com](mailto:limingwang99@yahoo.com)

Email: [yaoqingqiang@126.com](mailto:yaoqingqiang@126.com)

Email: [chengtiewu@mail.sic.ac.cn](mailto:chengtiewu@mail.sic.ac.cn)

#Rongcai Lin and Cuijun Deng are co-first authors.

**Table S1.** The primer sequences used for RT-qPCR analysis

| Gene              | Forward primer                  | Reverse primer                |
|-------------------|---------------------------------|-------------------------------|
| GAPDH<br>(rabbit) | 5-TCACCATCTTCCAGGAGCGA          | 5-CACAATGCCGAAGTGGTCGT        |
| COL II            | 5-AACACTGCCAACGTCCAGAT          | 5-CTGCAGCACGGTATAGGTGA        |
| ACAN              | 5-AGGTCGTGGTGAAAGGTGTT<br>G     | 5-GTAGGTTCTCACGCCAGGGA        |
| SOX-9             | 5-GGTGCTCAAGGGCTACGACT          | 5-GGGTGGTCTTTCTTGTGCTG        |
| HIF-1 $\alpha$    | 5-GCCACCACTGACGATTA<br>AA<br>CC | 5-GGTGATGTTGTGGCACTAGC        |
| GAPDH<br>(mouse)  | 5-TGACCACAGTCCATGCCATC          | 5-GACGGACACATTGGGGGTA<br>G    |
| TNF- $\alpha$     | 5-CTGAACTTCGGGGTGATCGG          | 5-GGCTTGTCACTCGAATTTTG<br>AGA |
| IL-18             | 5-TGGCCGACTTCACTGTACAA<br>C     | 5-TGGGGTTCACTGGCACTTTG        |
| IL-10             | 5-GAGAAGCATGGCCCAGAAAT<br>C     | 5-GAGAAATCGATGACAGCGC<br>C    |
| iNOS              | 5-CAGAAGTGCAAAGTCTCAG<br>ACAT   | 5-GTCATCTTGTATTGTTGGGCT       |
| CD206             | 5-AGACGAAATCCCTGCTACTG          | 5-CACCCATTCGAAGGCATTC         |

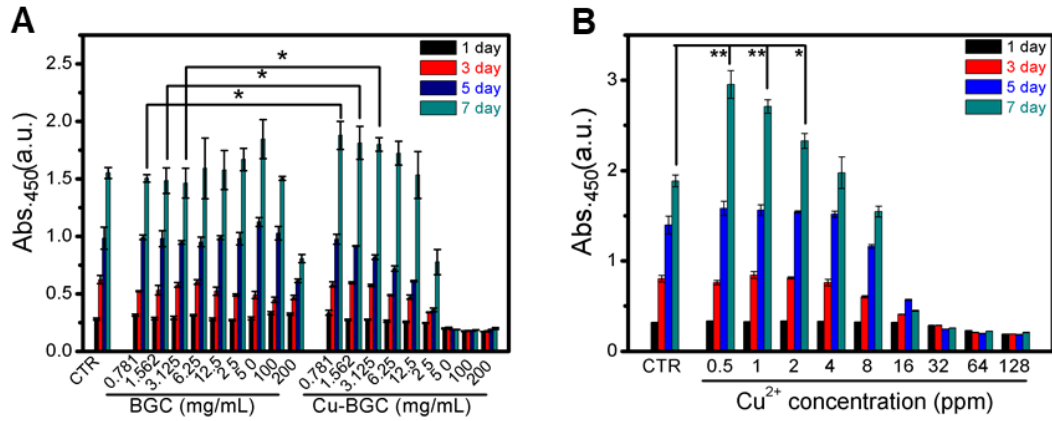

**Figure S1.** The proliferation of chondrocytes treated with BGC, Cu-BGC ionic extracts and different concentrations of  $\text{Cu}^{2+}$  ions. As compared with CTR group, the proliferation of chondrocytes treated with different concentrations of Cu-BGC extracts (A) and  $\text{Cu}^{2+}$  ions (B) was improved within a certain concentration range, respectively. (n=6, \*p<0.05, \*\*p<0.01, \*\*\*p<0.001)

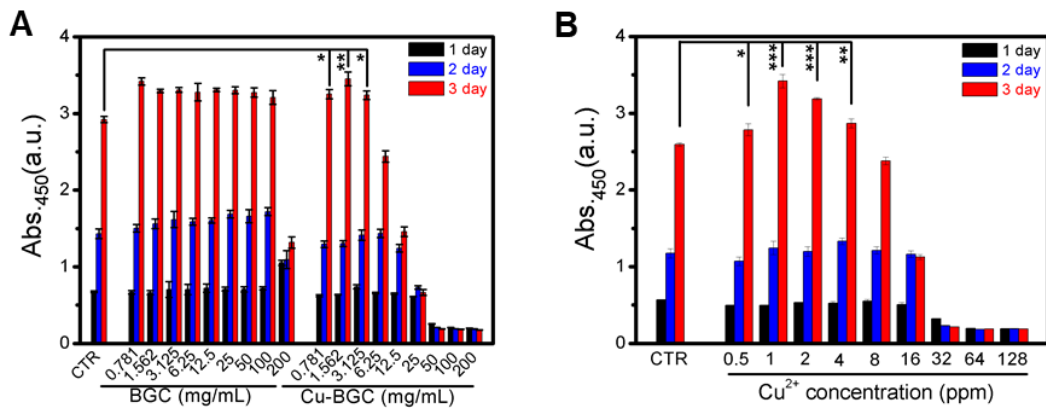

**Figure S2.** The proliferation of macrophages. The proliferation of macrophages cultured with the ionic products of Cu-BGC (A) and different concentrations of  $\text{Cu}^{2+}$  ions (B) was enhanced within certain concentrations range, respectively. (n=6, \*p<0.05, \*\*p<0.01, \*\*\*p<0.001)

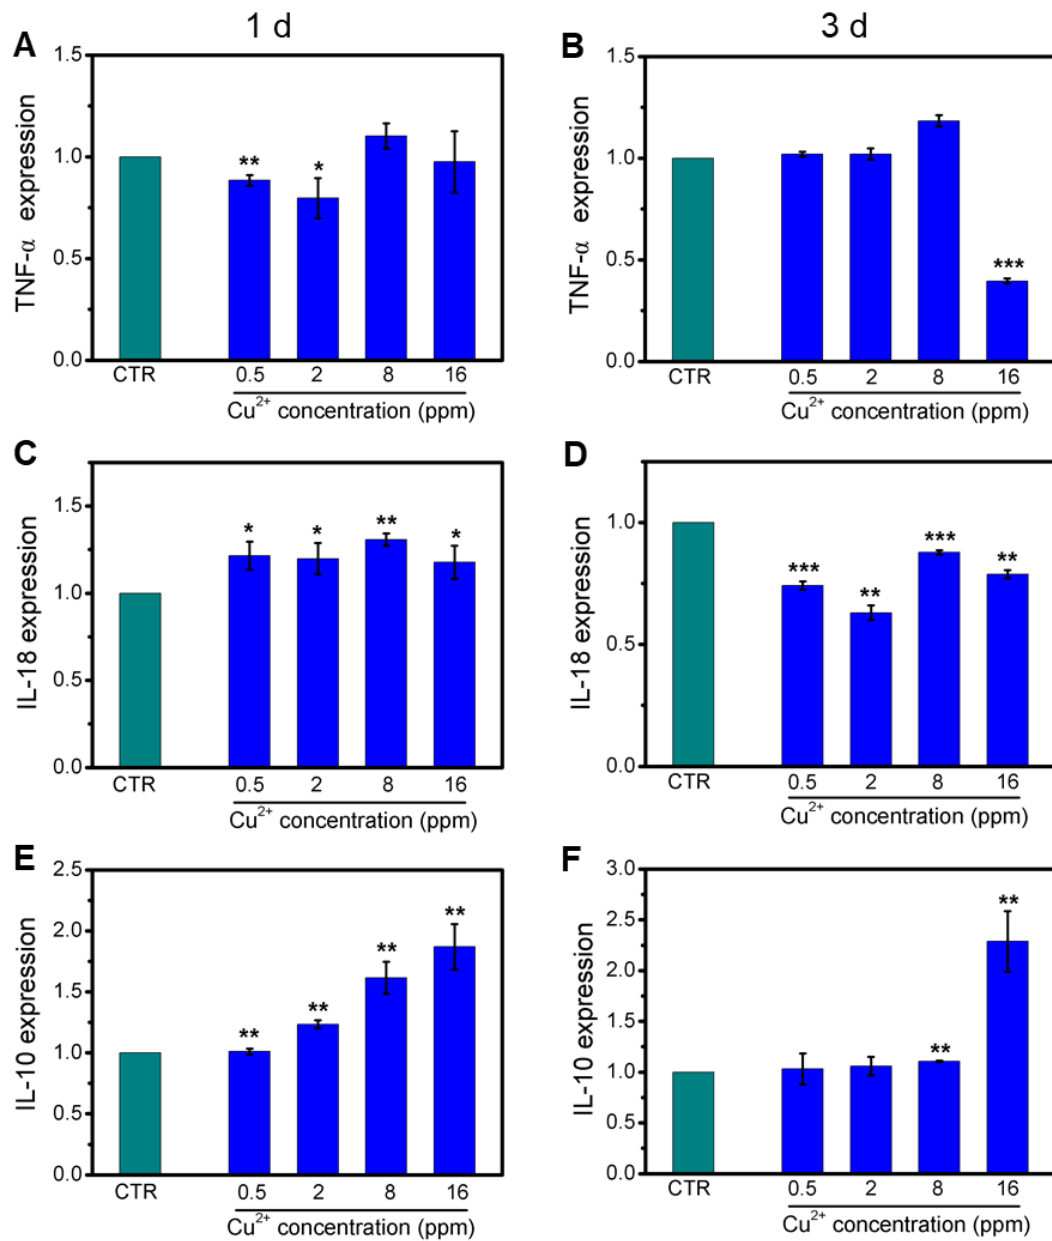

**Figure S3.** The inflammatory cytokine expression in macrophages stimulated by different concentrations of  $\text{Cu}^{2+}$  ions. The expression of pro-inflammatory cytokine (TNF- $\alpha$ : A, B; IL-18: C, D) was inhibited, and the anti-inflammatory cytokine (IL-10: E, F) was enhanced after treating with different concentrations of  $\text{Cu}^{2+}$  ions for 3 days. The relative gene amount of CTR group was set as 1. (n=3, \*p<0.05, \*\*p<0.01, \*\*\*p<0.001)

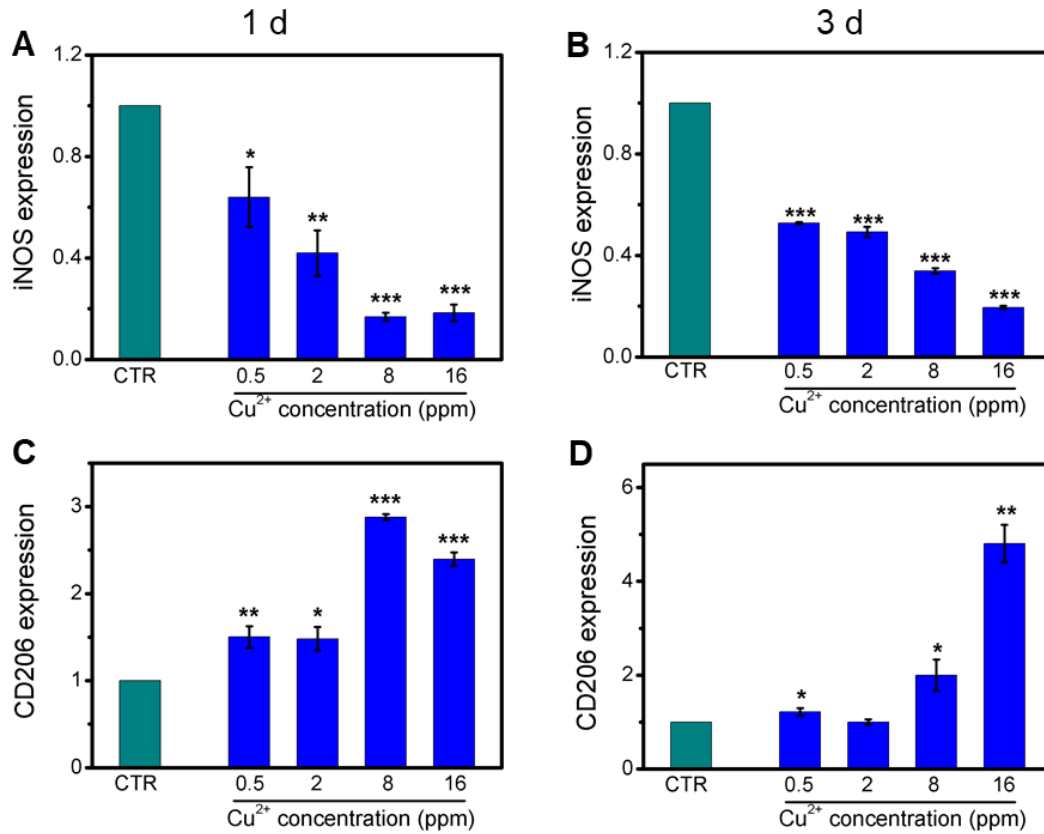

**Figure S4.** The expression of macrophage surface markers in macrophage after treating with different concentrations of  $\text{Cu}^{2+}$  ions at day 1 and 3. (A, B) M1 marker: iNOS; (C, D) M2 marker: CD206. The macrophage phenotype was changed to an anti-inflammatory M2 phenotype after treating with different concentrations of  $\text{Cu}^{2+}$  ions. The relative gene amount of CTR group was set as 1. (n=3, \*p<0.05, \*\*p<0.01, \*\*\*p<0.001)

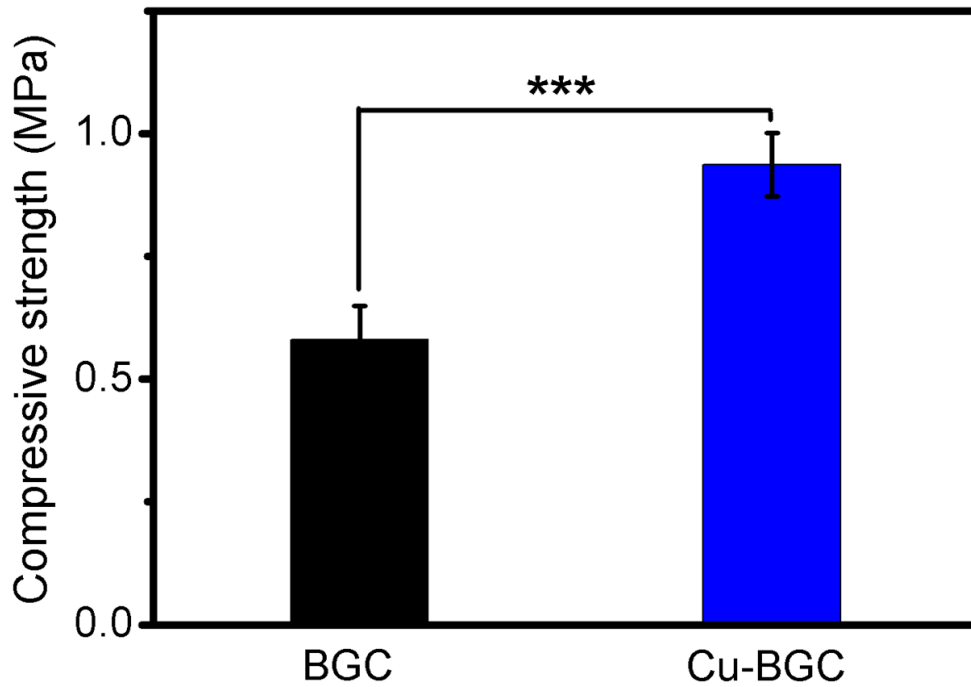

**Figure S5.** The compressive strength of BGC and Cu-BGC scaffolds. (A) BGC scaffold, (B) Cu-BGC scaffold. The results indicated that Cu-BGC scaffolds possess a higher compressive strength as compared with BGC scaffolds. (n=6, \*p<0.05, \*\*p<0.01, \*\*\*p<0.001)

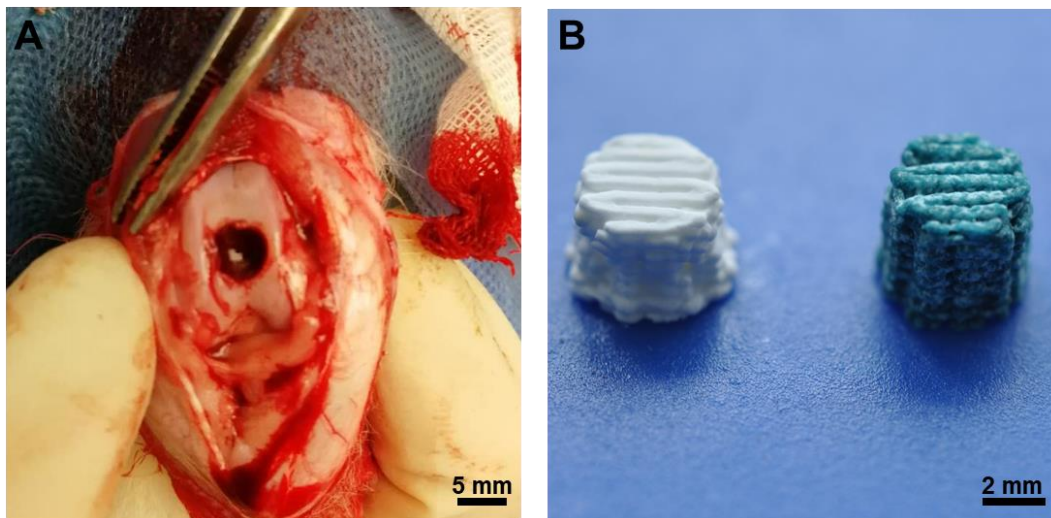

**Figure S6.** The digital photographs of the defect and the scaffolds during the surgery. (A) The osteochondral defect was 5 mm high and 5 mm in diameter. (B) The size of scaffolds which were implanted into the defects was 5 mm high and 5 mm in diameter.

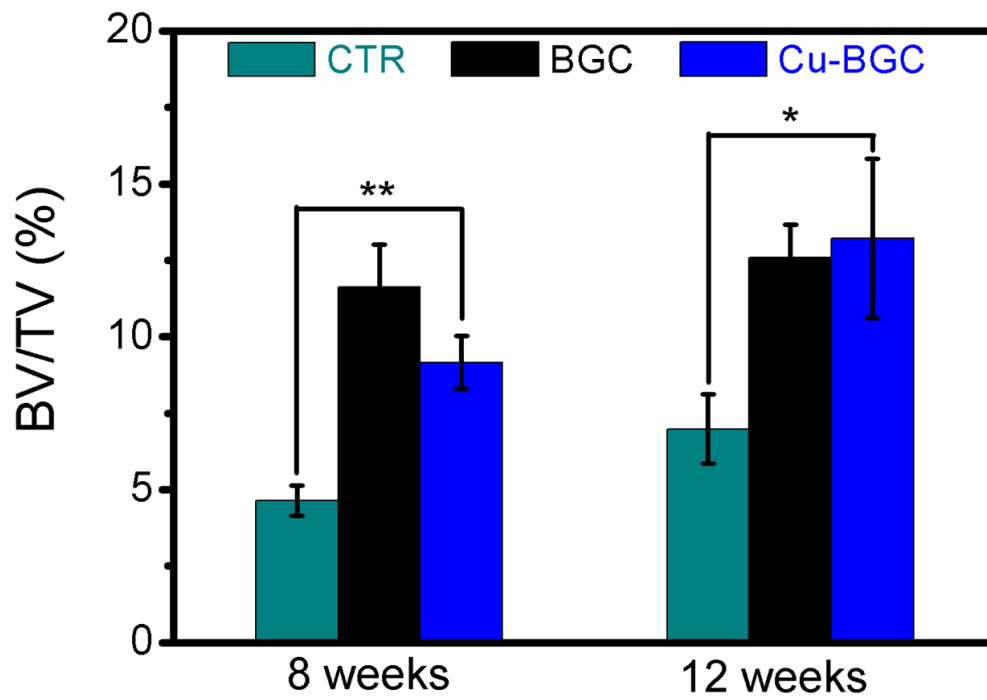

**Figure S7.** Micro-CT imaging analysis (BV/TV) of the defects at 8 and 12 weeks. Micro-CT analysis of defect space showed that it was greater level of bone formation in Cu-BGC group as compared to CTR group. (n=6, \*p<0.05, \*\*p<0.01, \*\*\*p<0.001)

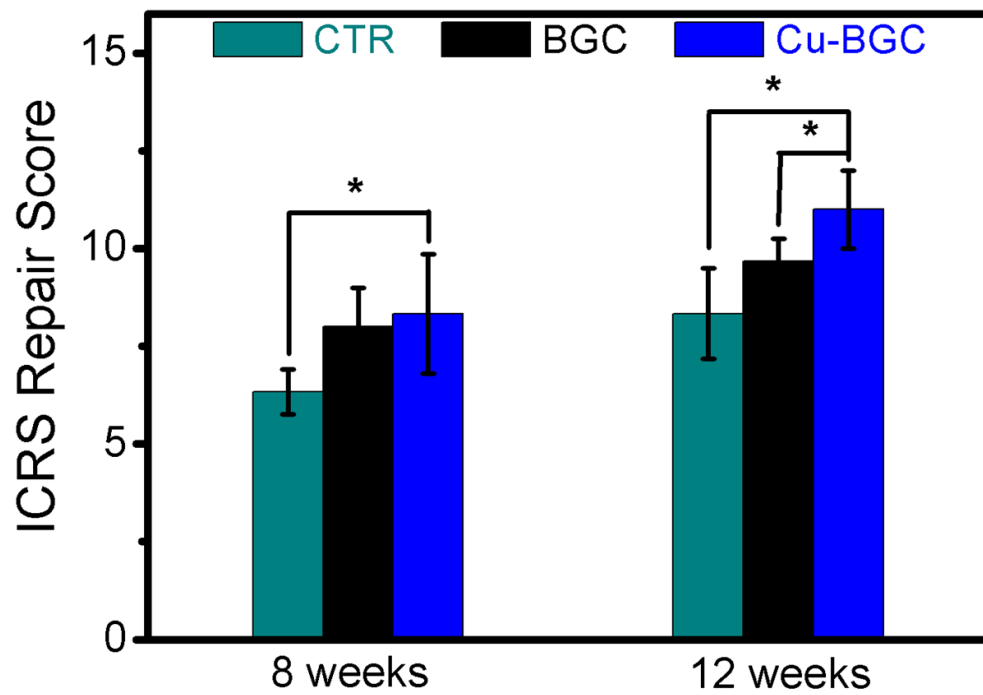

**Figure S8.** The ICRS scores of knee samples at 8 and 12 weeks of postsurgery. Blinded quantity of ICRS scores for CTR, BGC and Cu-BGC groups by three investigators, the results showed that the ICRS score of Cu-BGC group was enhanced as compared to CTR and BGC groups at 12 weeks. (n=6, \*p<0.05, \*\*p<0.01, \*\*\*p<0.001)
